# Supplementary material
Source: PubMed Central journal article supplement (PMC2891781)

S1.  $^1\text{H}$  NMR spectrum (600 MHz,  $\text{CD}_3\text{OD}$ ) of **3** and **4**.

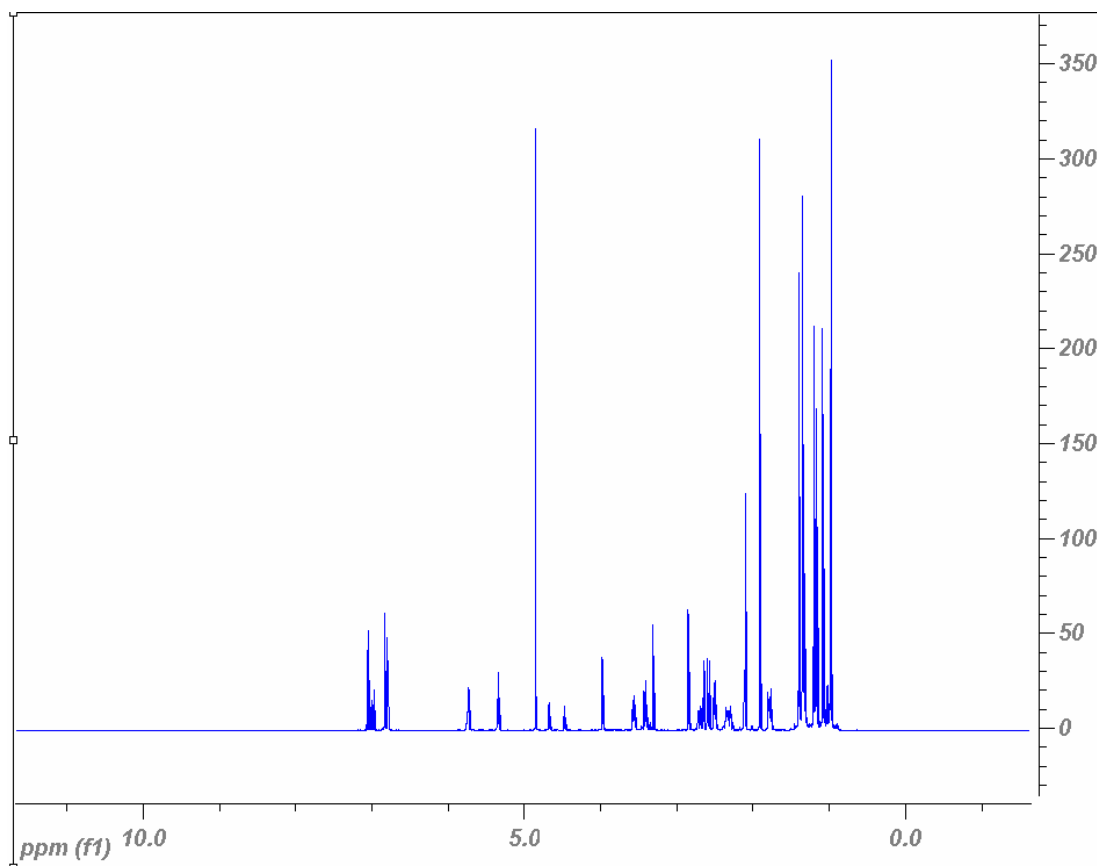

S2. HMBC spectrum (600 MHz, CD<sub>3</sub>OD) of **3** and **4**.

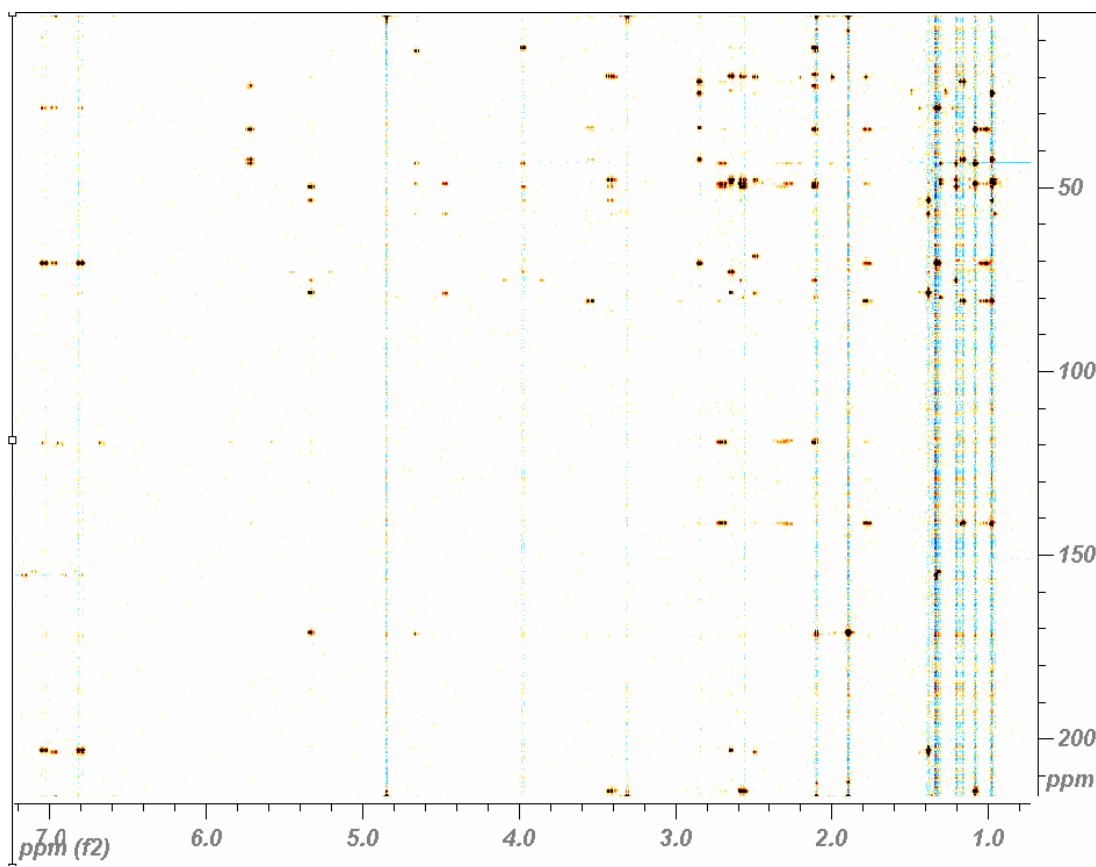

S3.  $^1\text{H}$  NMR spectrum (600 MHz,  $\text{CD}_3\text{OD}$ ) of cucurbitacin F (**1**).

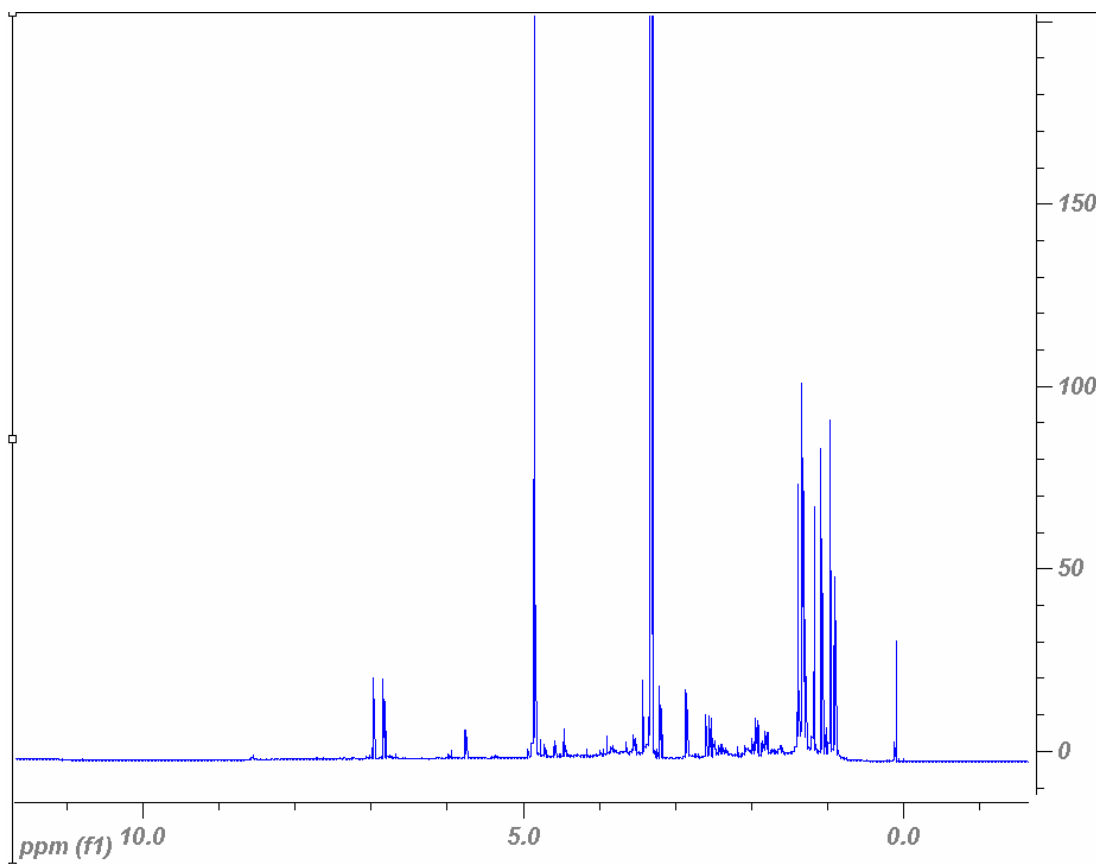

S4. HMBC spectrum (600 MHz, CD<sub>3</sub>OD) of cucurbitacin F (**1**).

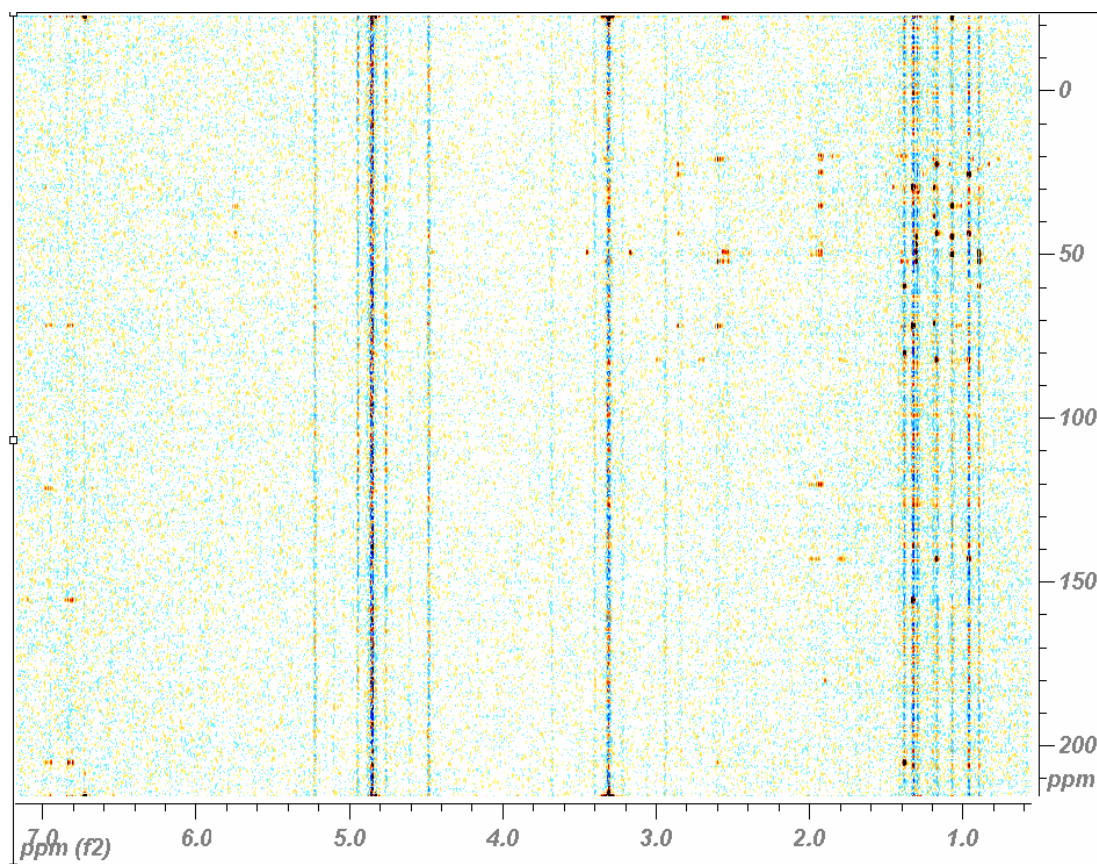

S5.  $^1\text{H}$  NMR spectrum (600 MHz,  $\text{CD}_3\text{OD}$ ) of cucurbitacin F (**1**) + dihydrocucurbitacin F (**2**) + biphenyl glucoside mixture.

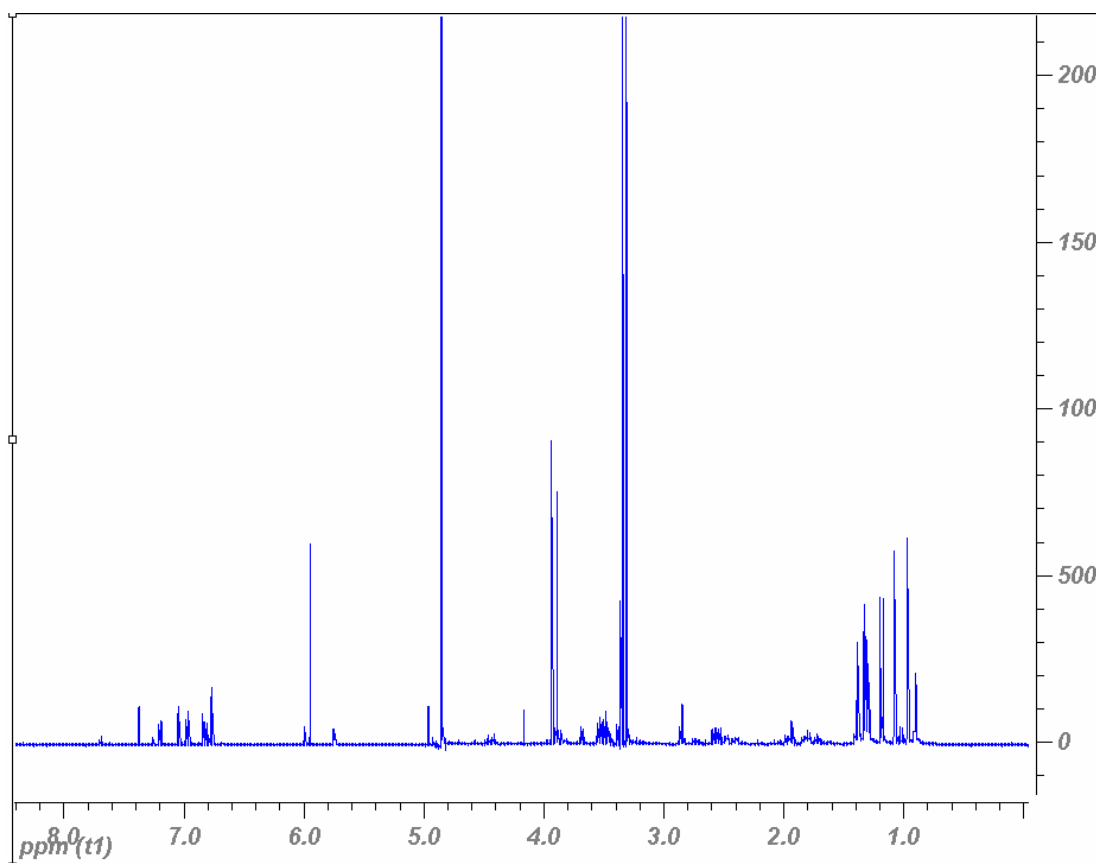

S6. HMBC spectrum (600 MHz, CD<sub>3</sub>OD) of cucurbitacin F (1) + dihydrocucurbitacin F (2) + biphenyl glucoside mixture.

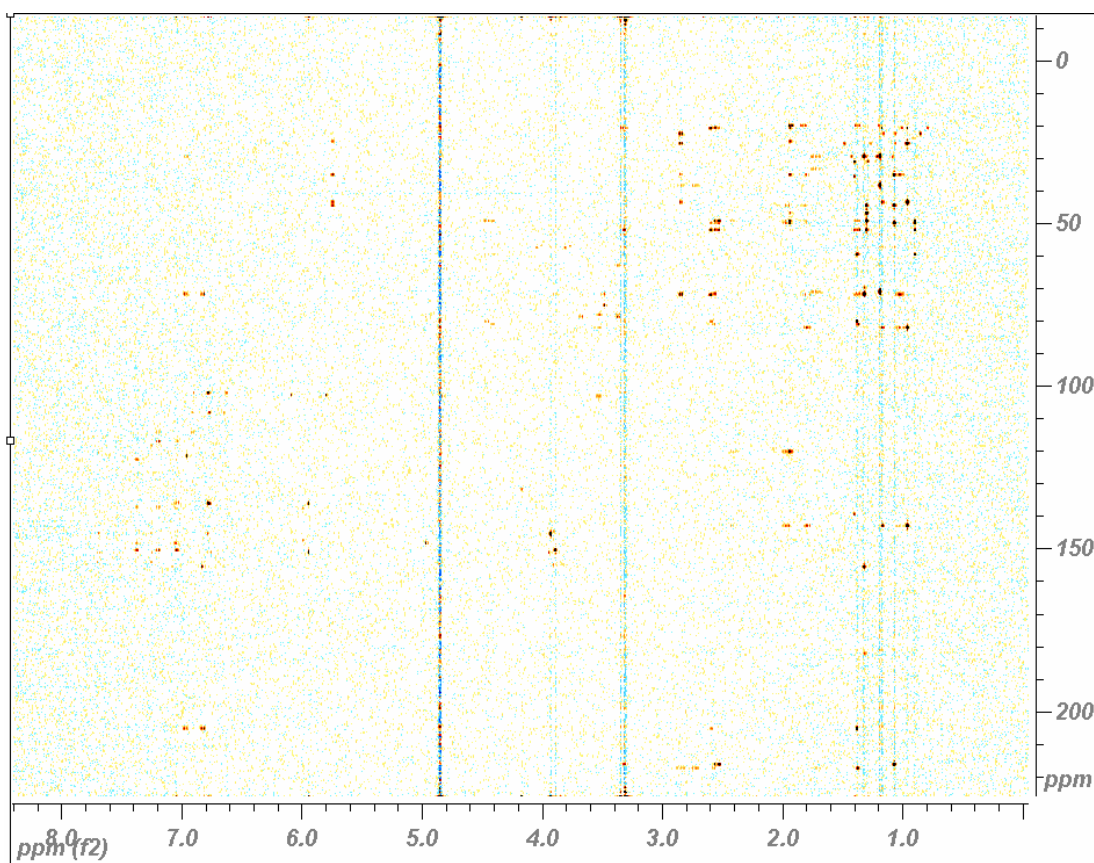

Supplement: NIHMS138771-supplement-1.pdf [file NIHMS138771-supplement-1.pdf]
